# Supplementary material for: Graph embedding on biomedical networks: methods, applications and evaluations
Source: PubMed Central journal article supplement — Bioinformatics. 2019 Oct 4;36(4):1241–51. doi: 10.1093/bioinformatics/btz718 (PMC7703771; doi:10.1093/bioinformatics/btz718), 2019-10-04
Supplement: btz718_supplementary_data.pdf [file btz718_supplementary_data.pdf]

# *Graph Embedding on Biomedical Networks: Methods, Applications, and Evaluations*

## **Supplementary Materials**

Xiang Yue<sup>1,\*</sup>, Zhen Wang<sup>1</sup>, Jingong Huang<sup>2</sup>, Srinivasan Parthasarathy<sup>1</sup>,  
Soheil Moosavinasab<sup>3</sup>, Yungui Huang<sup>3</sup>, Simon M. Lin<sup>3</sup>, Wen Zhang<sup>4</sup>,  
PingZhang<sup>1,5</sup>, and Huan Sun<sup>1,\*</sup>

<sup>1</sup>Department of Computer Science and Engineering, The Ohio State University,  
Columbus, OH, USA,

<sup>2</sup>Department of Electrical and Computer Engineering, The Ohio State University,  
Columbus, OH, USA,

<sup>3</sup>Research Information Solutions and Innovation, The Research Institute at Nationwide  
Children's Hospital, Columbus, OH, USA,

<sup>4</sup>College of Informatics, Huazhong Agricultural University, Wuhan, Hubei, China,

<sup>5</sup>Department of Biomedical Informatics, The Ohio State University, Columbus, OH,  
USA

**\*To whom correspondence should be addressed.**

**([yue.149@osu.edu](mailto:yue.149@osu.edu), [sun.397@osu.edu](mailto:sun.397@osu.edu))**

# Index

|                                                                                                                                                                                                    |           |
|----------------------------------------------------------------------------------------------------------------------------------------------------------------------------------------------------|-----------|
| <b>1 Hyper-parameters .....</b>                                                                                                                                                                    | <b>1</b>  |
| Fig. S1: The influence of <i>dimensionality</i> on different embedding methods on NDFRT DDA, DrugBank DDI and STRING PPI datasets (the results of CTD DDA is included in the main manuscript)..... | 1         |
| Fig. S2: The influence of <i>dimensionality</i> on different embedding methods on Clini COOC, Node2vec PPI and MashUp PPI datasets. ....                                                           | 2         |
| Fig. S3: The influence of the main hyper-parameter: <i>Ksteps</i> on <i>GraRep</i> .....                                                                                                           | 3         |
| Fig. S4: The influence of the main hyper-parameters: <i>number of walks</i> and <i>walk length</i> on <i>DeepWalk</i> . ....                                                                       | 4         |
| Fig. S5: The influence of the main hyper-parameters: <i>p</i> and <i>q</i> on <i>node2vec</i> . ....                                                                                               | 5         |
| Fig. S6: The influence of the main hyper-parameters: <i>number of walks</i> and <i>walk length</i> on <i>struc2vec</i> . ....                                                                      | 6         |
| Fig. S7: The influence of the main hyper-parameter: <i>epochs</i> on <i>LINE</i> . ....                                                                                                            | 7         |
| Fig. S8: The influence of the main hyper-parameters: $\alpha$ and $\beta$ on <i>SDNE</i> . ....                                                                                                    | 8         |
| Fig. S9: The influence of the main hyper-parameter: <i>hidden units</i> on <i>GAE</i> . ....                                                                                                       | 9         |
| Table S1: Hyper-parameters set for different embedding methods in Table 3 and Table 4 of the main manuscript. ....                                                                                 | 10        |
| Table S2: Performance of different embedding methods on CTD DDA, NDFRT DDA, DrugBank DDI and STRING PPI datasets of Link Prediction .....                                                          | 11        |
| Table S3: Performance of different embedding methods on Clini COOC, Node2vec PPI, MashUp PPI datasets of Node Classification .....                                                                 | 12        |
| <b>2 Datasets .....</b>                                                                                                                                                                            | <b>13</b> |
| Fig. S10: Node degree histograms of seven compiled datasets.....                                                                                                                                   | 13        |
| <b>3 Performance of “fine-tuning” .....</b>                                                                                                                                                        | <b>14</b> |
| Table S4: Empirical results of “fine-tuning” on CTD DDA graph. ....                                                                                                                                | 14        |
| <b>4 Implementation Details.....</b>                                                                                                                                                               | <b>15</b> |
| 4.1 Hardware and Software .....                                                                                                                                                                    | 15        |
| 4.2 Experimental settings for comparison with state-of-the-arts in Section 4.3, 4.4 of the main manuscript. ....                                                                                   | 16        |

# 1 Hyper-parameters

From Page 1-9, we plot the performance of different embedding methods when these hyper-parameters are tuned.

**Fig. S1: The influence of *dimensionality* on different embedding methods on three *link prediction* task datasets: NDFRT DDA, DrugBank DDI and STRING PPI (the results of CTD DDA is included in the main manuscript).**

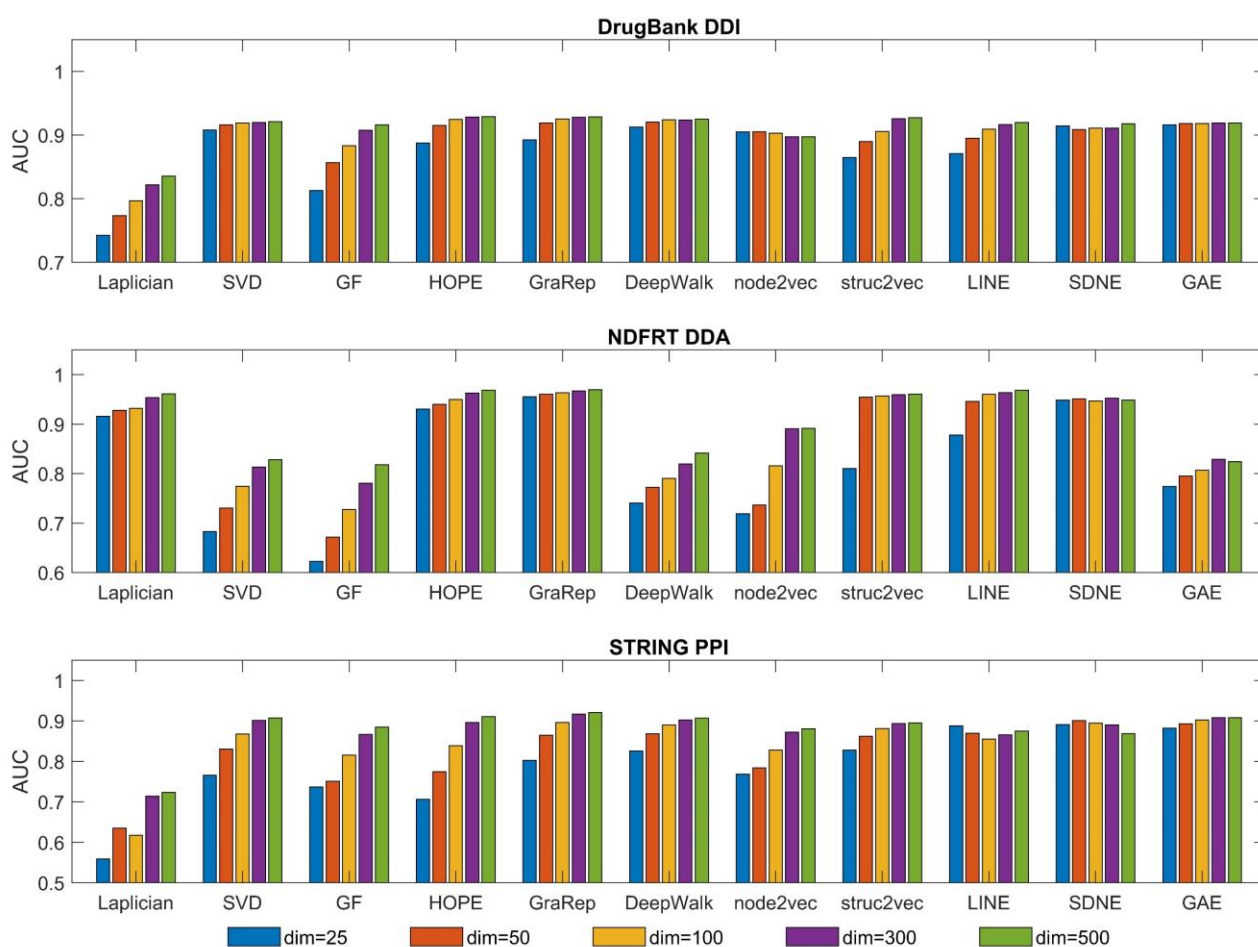

**Fig. S2: The influence of *dimensionality* on different embedding methods on three *node classification* task datasets: Clini COOC, Node2vec PPI and MashUp PPI datasets.**

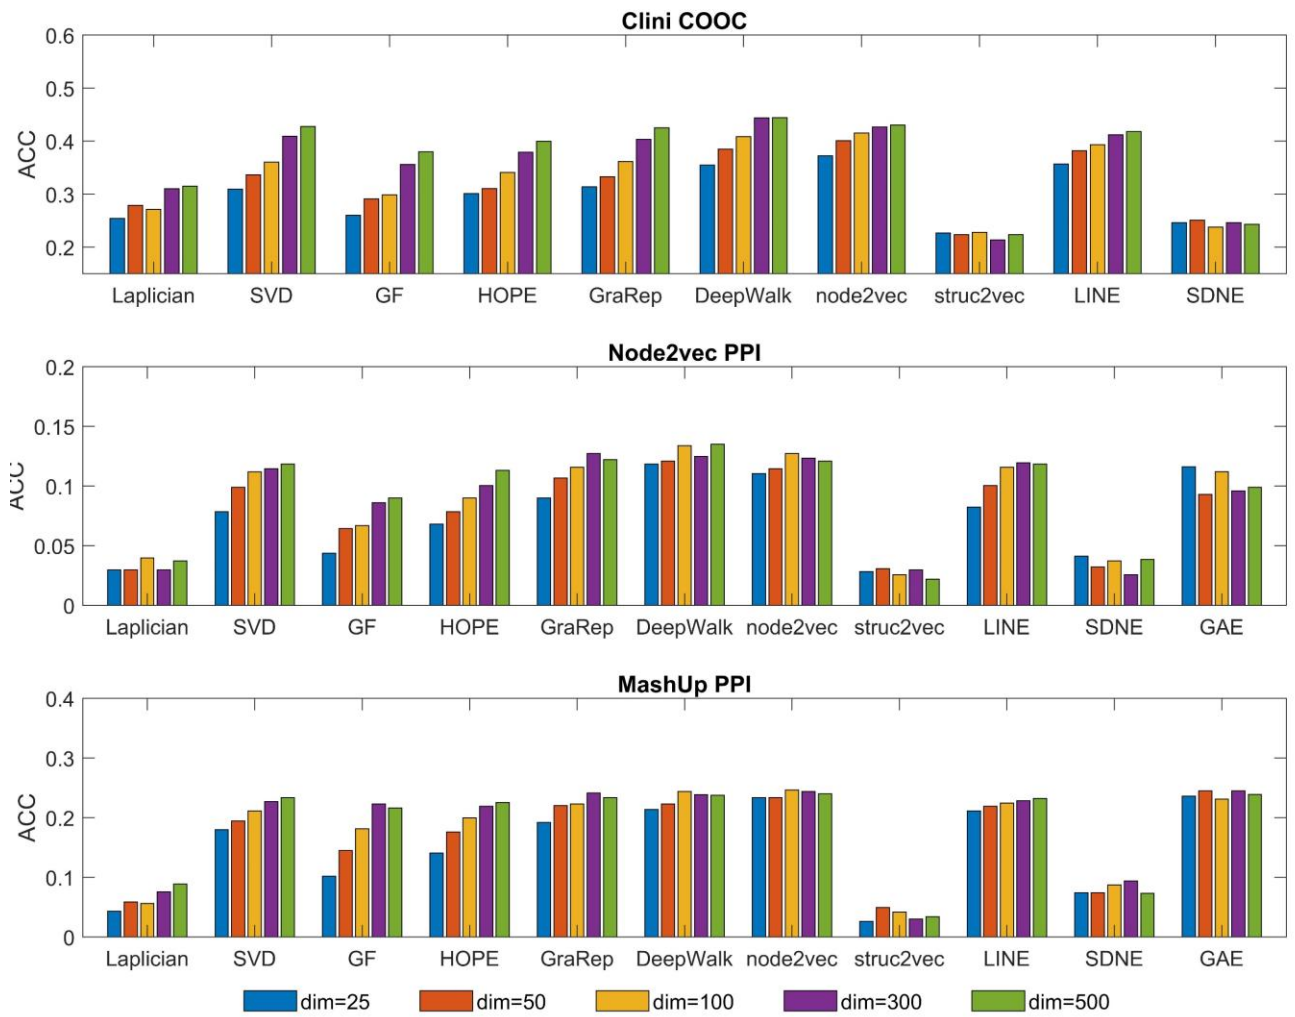

**Fig. S3: The influence of the main hyper-parameter: *Ksteps* on *GraRep*.**

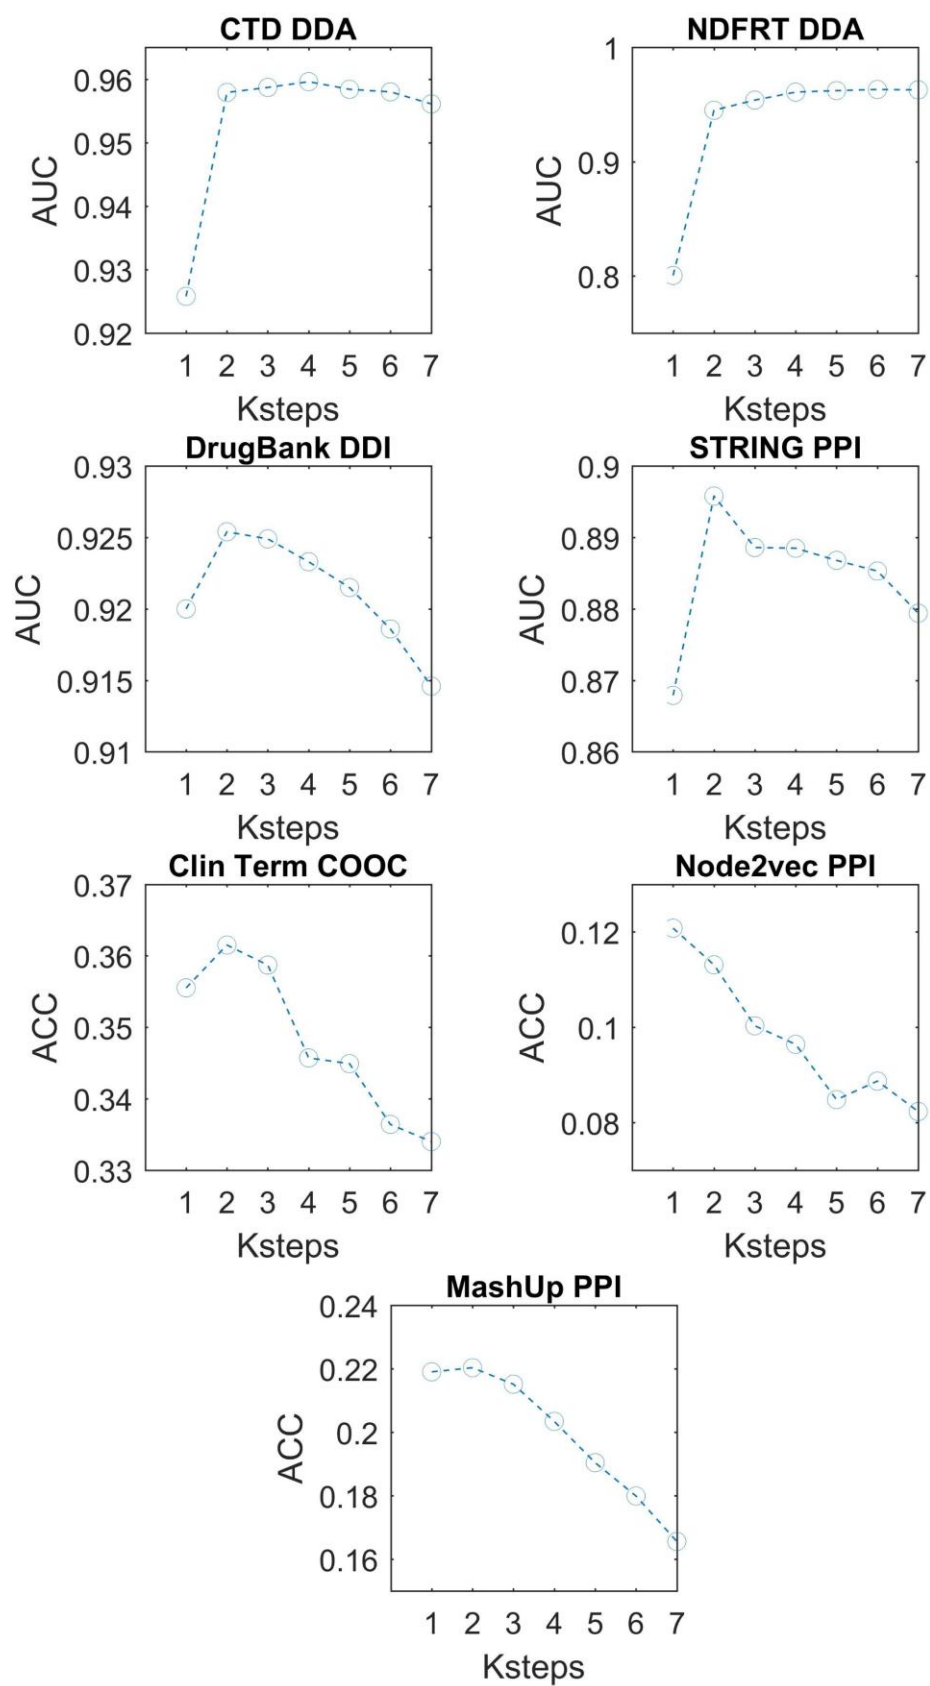

**Fig. S4: The influence of the main hyper-parameters: *number of walks* and *walk length* on *DeepWalk*.**

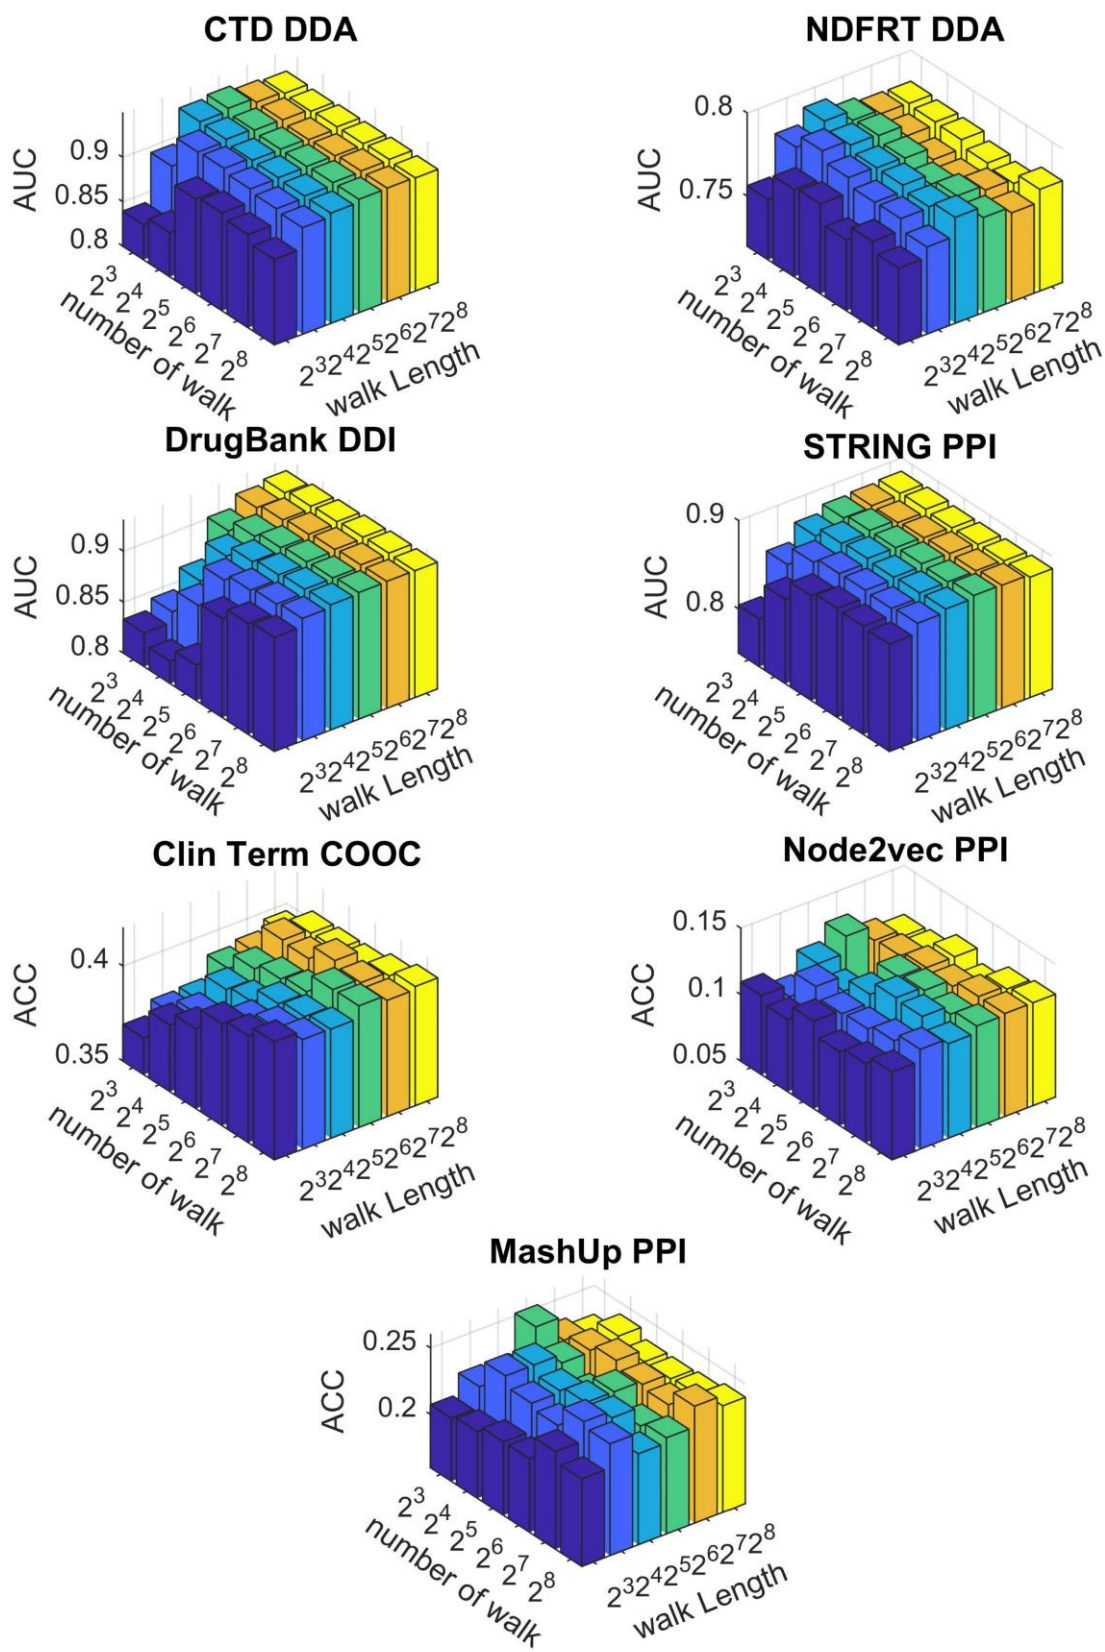

**Fig. S5: The influence of the main hyper-parameters:  $p$  and  $q$  on *node2vec*.**

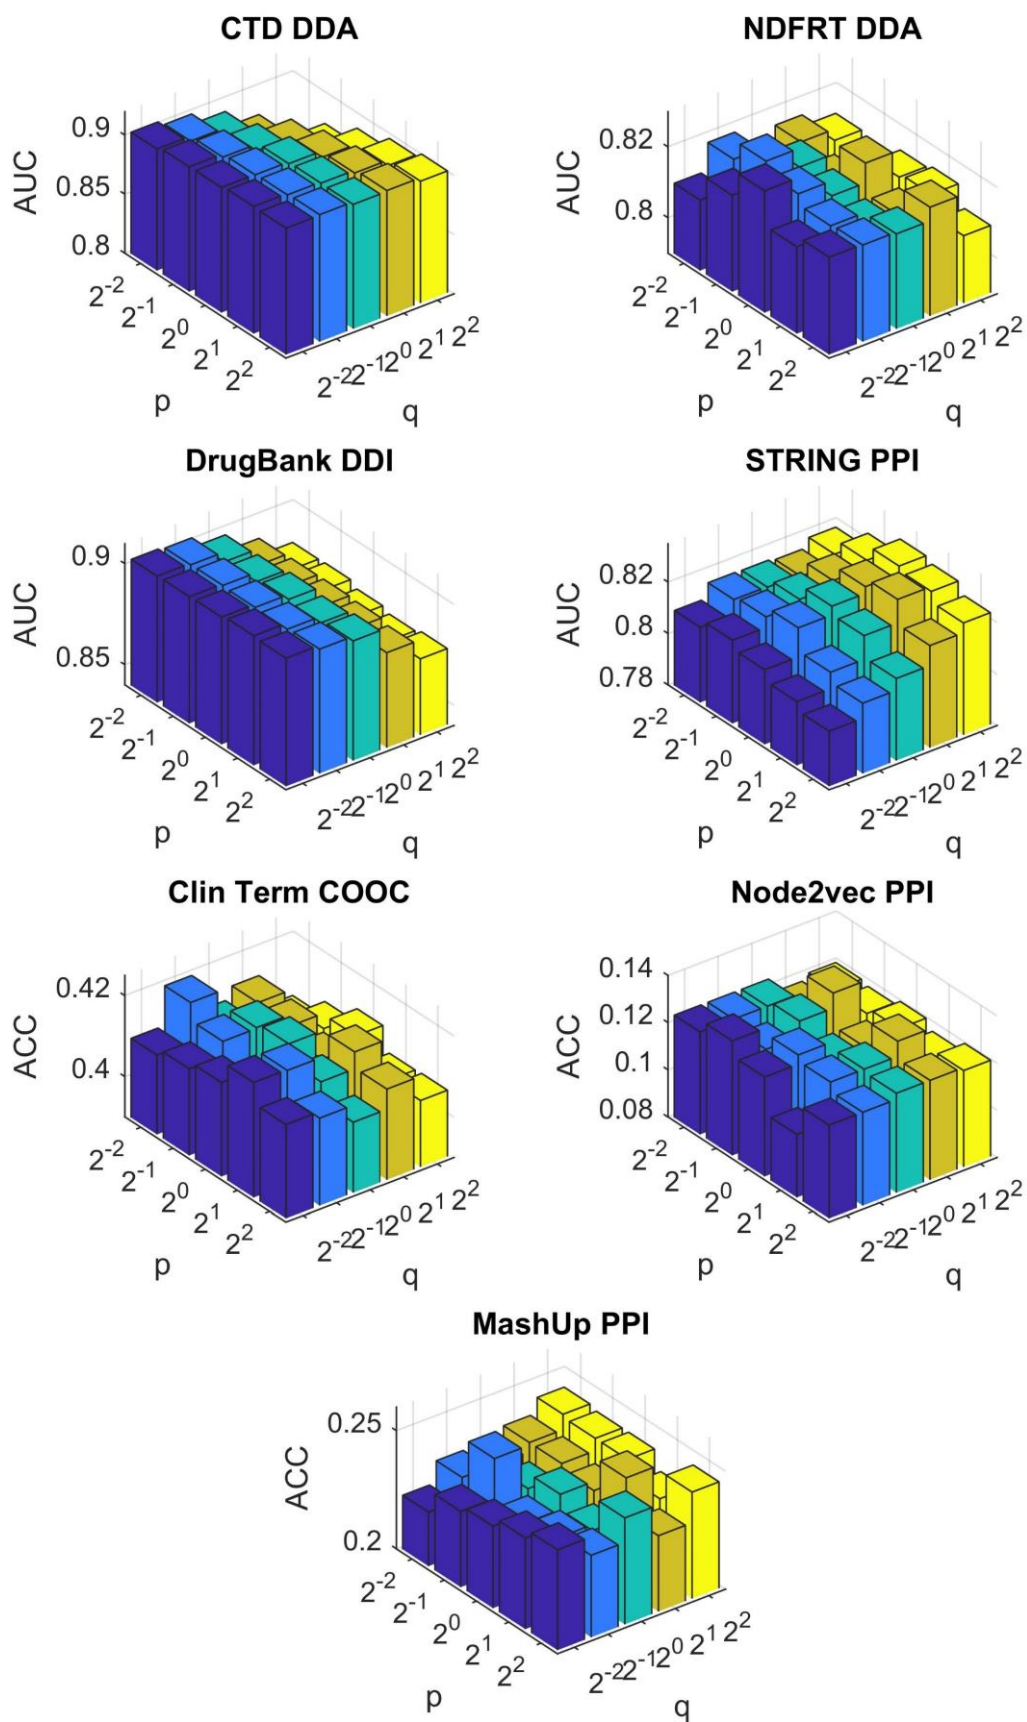

**Fig. S6: The influence of the main hyper-parameters: *number of walks* and *walk length* on *struc2vec*.**

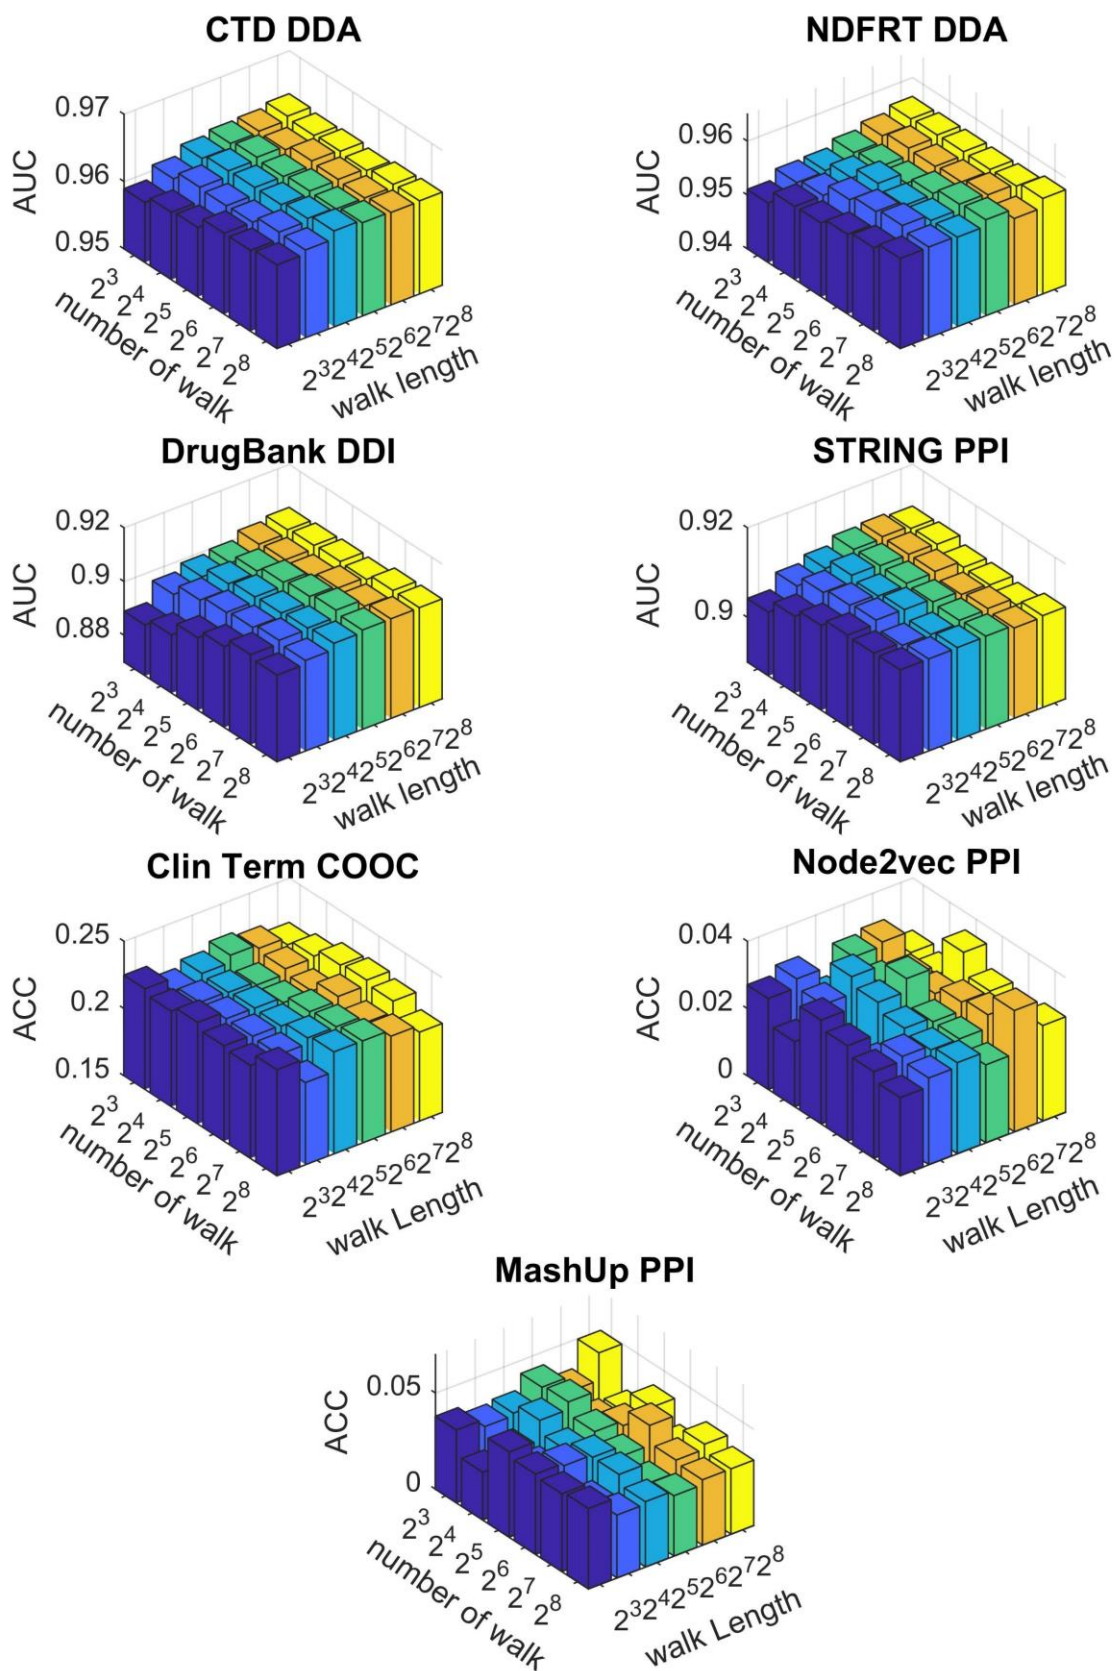



**Fig. S7: The influence of the main hyper-parameter: *epochs* on *LINE*.**

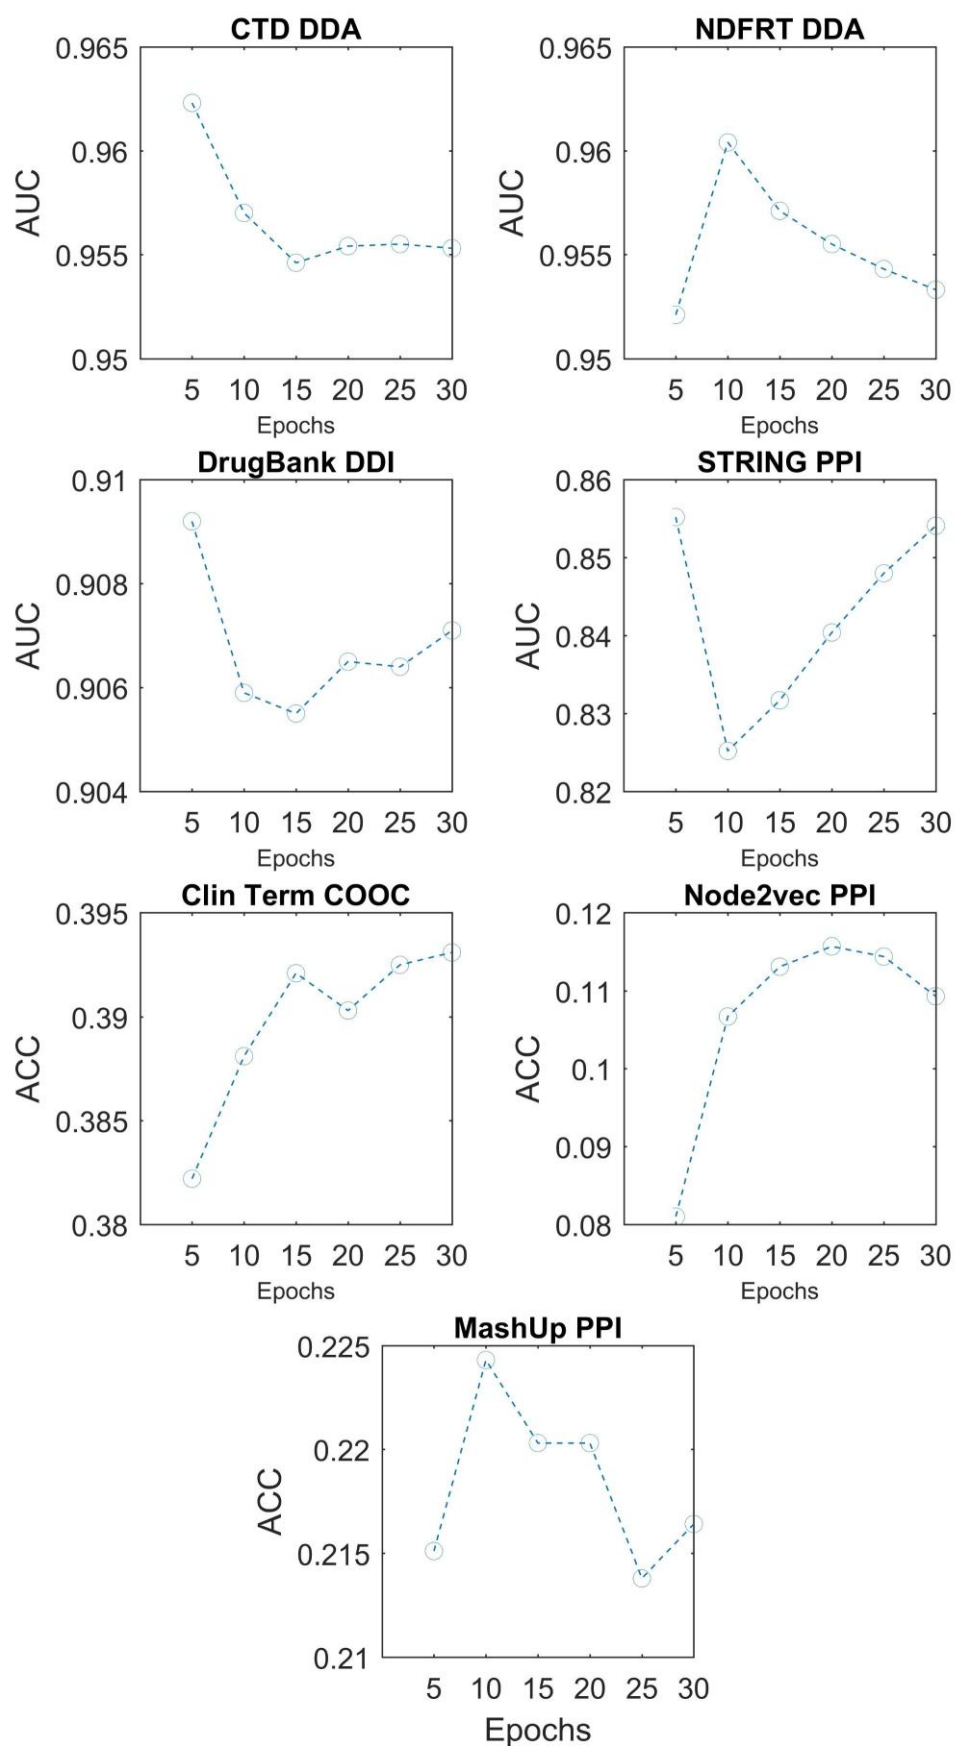

**Fig. S8: The influence of the main hyper-parameters:  $\alpha$  and  $\beta$  on *SDNE*.**

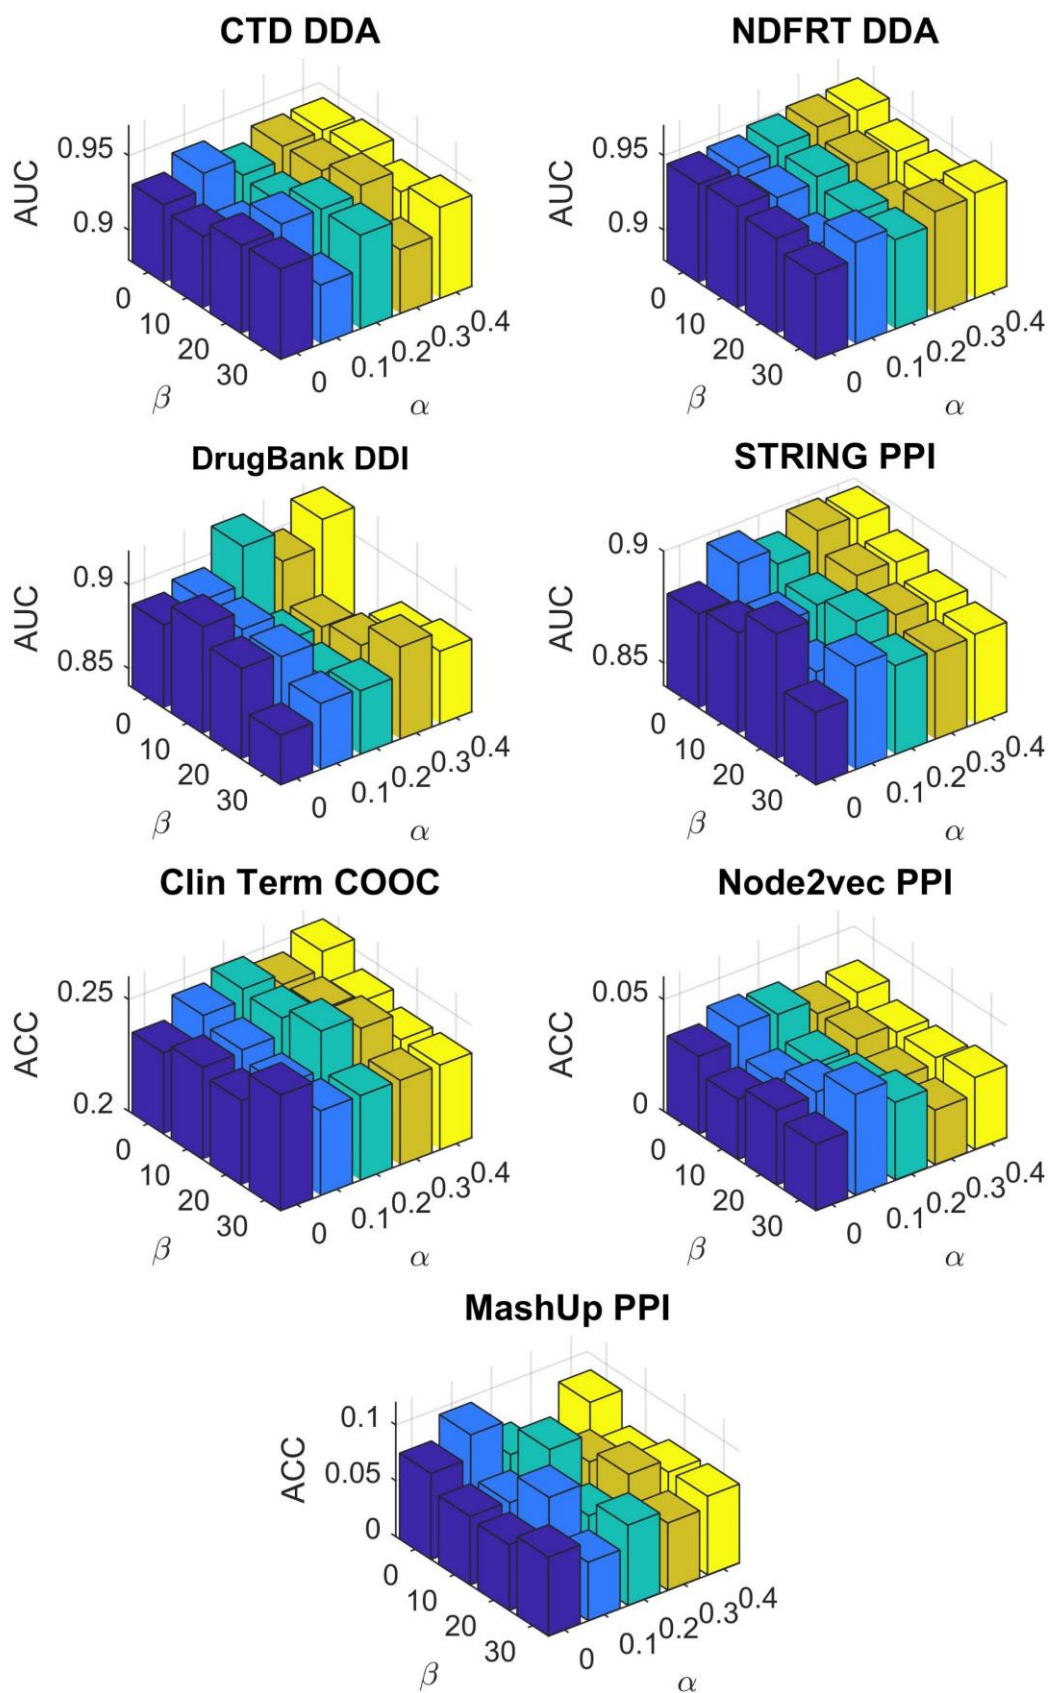

**Fig. S9: The influence of the main hyper-parameter: *hidden units* on *GAE*.**

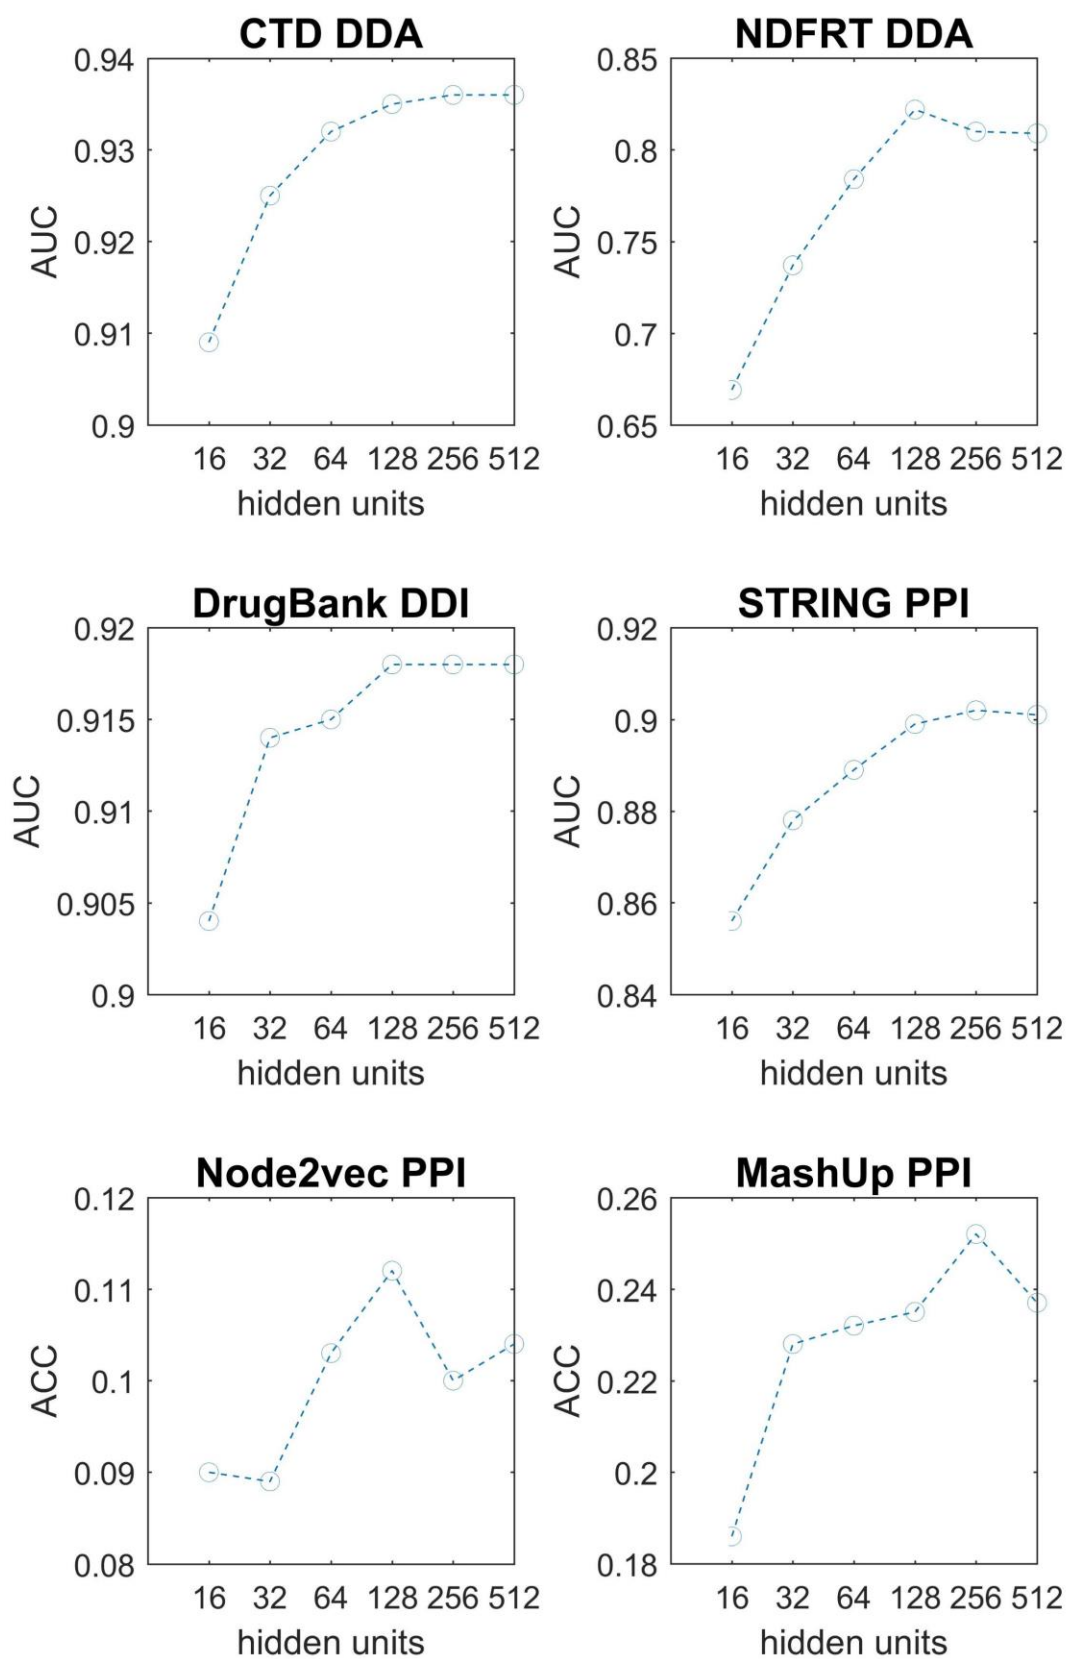

**Table S1: Hyper-parameters set for different embedding methods in Table 3 and Table 4 of the main manuscript.**

|                  | Link Prediction                      |                                      |                                      |                                      | Node Classification                 |                                      |                                    |
|------------------|--------------------------------------|--------------------------------------|--------------------------------------|--------------------------------------|-------------------------------------|--------------------------------------|------------------------------------|
| Method name      | CTD<br>DDA                           | NDFRT<br>DDA                         | DrugBank<br>DDI                      | STRING<br>PPI                        | Clin Term<br>COOC                   | Node2vec<br>PPI                      | MashUp<br>PPI                      |
| <b>GraRep</b>    | k-step = 4                           | k-step = 6                           | k-step = 2                           | k-step = 2                           | k-step = 2                          | k-step = 1                           | k-step = 2                         |
| <b>DeepWalk</b>  | number-walks=8,<br>walk-length=64    | number-walks=8,<br>walk-length=32    | number-walks=128,<br>walk-length=256 | number-walks=256, walk-<br>length=64 | number-walks=64,<br>walk-length=128 | number-walks=64,<br>walk-length=32   | number-walks=8,<br>walk-length=64  |
| <b>node2vec</b>  | p=2, q=0.25                          | p=1, q=0.25                          | p=2, q=0.25                          | p=2, q=2                             | p=2, q=0.25                         | p=0.5, q=2                           | p=0.5, q=0.5                       |
| <b>struc2vec</b> | number-walks=256, walk-<br>length=32 | number-walks=256, walk-<br>length=64 | number-walks=128,<br>walk-length=64  | number-walks=64,<br>walk-length=16   | number-walks=64,<br>walk-length=256 | number-walks=256,<br>walk-length=128 | number-walks=8,<br>walk-length=256 |
| <b>LINE</b>      | epochs=5                             | epochs=10                            | epochs=5                             | epochs=5                             | epochs=30                           | epochs=20                            | epochs=10                          |
| <b>SDNE</b>      | $\alpha=0.3, \beta=20$               | $\alpha=0.4, \beta=0$                | $\alpha=0.4, \beta=0$                | $\alpha=0.3, \beta=0$                | $\alpha=0.2, \beta=20$              | $\alpha=0.1, \beta=30$               | $\alpha=0.1, \beta=0$              |
| <b>GAE</b>       | hidden units=512                     | hidden units=128                     | hidden units=128                     | hidden units=256                     | -                                   | hidden units=128                     | hidden units=256                   |

**Table S2: Performance of different embedding methods on CTD DDA, NDFRT DDA, DrugBank DDI and STRING PPI datasets of Link Prediction**

| Method Category     |                            | Method Name | CTD DDA     |             |             | NDFRT DDA   |             |             | DrugBank DDI |             |             | STRING PPI  |             |             |
|---------------------|----------------------------|-------------|-------------|-------------|-------------|-------------|-------------|-------------|--------------|-------------|-------------|-------------|-------------|-------------|
|                     |                            |             | AUC         | ACC         | F1          | AUC         | ACC         | F1          | AUC          | ACC         | F1          | AUC         | ACC         | F1          |
| Traditional         | Matrix Factorization Based | Laplacian   | 0.856±0.004 | 0.793±0.003 | 0.802±0.003 | 0.930±0.003 | 0.917±0.004 | 0.921±0.004 | 0.796±0.002  | 0.720±0.002 | 0.729±0.002 | 0.639±0.021 | 0.596±0.016 | 0.586±0.017 |
|                     |                            | SVD         | 0.936±0.002 | 0.855±0.002 | 0.854±0.002 | 0.779±0.003 | 0.707±0.004 | 0.700±0.005 | 0.919±0.001  | 0.837±0.001 | 0.837±0.001 | 0.867±0.001 | 0.794±0.001 | 0.790±0.001 |
|                     |                            | GF          | 0.884±0.004 | 0.808±0.004 | 0.805±0.004 | 0.720±0.006 | 0.660±0.006 | 0.655±0.007 | 0.882±0.003  | 0.802±0.003 | 0.81±0.003  | 0.817±0.005 | 0.746±0.005 | 0.747±0.005 |
| Recently Proposed   |                            | HOPE        | 0.951±0.001 | 0.886±0.002 | 0.887±0.002 | 0.949±0.001 | 0.928±0.002 | 0.931±0.002 | 0.923±0.001  | 0.844±0.002 | 0.846±0.002 | 0.839±0.001 | 0.764±0.001 | 0.764±0.001 |
|                     |                            | GraRep      | 0.960±0.001 | 0.899±0.002 | 0.900±0.002 | 0.963±0.001 | 0.931±0.002 | 0.934±0.002 | 0.925±0.001  | 0.845±0.001 | 0.846±0.001 | 0.894±0.001 | 0.823±0.001 | 0.822±0.001 |
|                     | Random Walk Based          | DeepWalk    | 0.929±0.002 | 0.866±0.002 | 0.864±0.002 | 0.783±0.004 | 0.710±0.004 | 0.709±0.005 | 0.921±0.001  | 0.840±0.002 | 0.842±0.002 | 0.884±0.001 | 0.813±0.002 | 0.814±0.002 |
| node2vec            |                            | 0.911±0.002 | 0.838±0.002 | 0.835±0.002 | 0.819±0.005 | 0.742±0.005 | 0.741±0.006 | 0.902±0.001 | 0.819±0.001  | 0.819±0.001 | 0.828±0.003 | 0.758±0.003 | 0.756±0.003 |             |
| struc2vec           |                            | 0.965±0.001 | 0.903±0.002 | 0.903±0.002 | 0.958±0.001 | 0.913±0.002 | 0.912±0.002 | 0.904±0.001 | 0.826±0.002  | 0.83±0.002  | 0.909±0.001 | 0.838±0.001 | 0.841±0.001 |             |
| Deep Learning Based | LINE                       | 0.965±0.001 | 0.904±0.001 | 0.904±0.001 | 0.962±0.002 | 0.934±0.002 | 0.935±0.001 | 0.905±0.002 | 0.825±0.002  | 0.829±0.002 | 0.859±0.003 | 0.788±0.003 | 0.795±0.003 |             |
|                     | SDNE                       | 0.935±0.010 | 0.863±0.012 | 0.861±0.013 | 0.944±0.004 | 0.896±0.007 | 0.897±0.007 | 0.911±0.006 | 0.833±0.007  | 0.838±0.006 | 0.884±0.008 | 0.813±0.009 | 0.814±0.009 |             |
|                     | GAE                        | 0.937±0.001 | 0.857±0.002 | 0.856±0.002 | 0.813±0.007 | 0.735±0.006 | 0.730±0.007 | 0.917±0.001 | 0.836±0.001  | 0.840±0.001 | 0.900±0.001 | 0.827±0.001 | 0.829±0.002 |             |

**Table S3: Performance of different embedding methods on Clini COOC, Node2vec PPI, MashUp PPI datasets of Node Classification**

| Method Category   |                            | Method Name | Clini COOC  |             |             | Node2vec PPI |             |             | Mashup PPI  |             |             |
|-------------------|----------------------------|-------------|-------------|-------------|-------------|--------------|-------------|-------------|-------------|-------------|-------------|
|                   |                            |             | Accuracy    | Micro-F1    | Macro-F1    | Accuracy     | Micro-F1    | Macro-F1    | Accuracy    | Micro-F1    | Macro-F1    |
| Traditional       | Matrix Factorization Based | Laplacian   | 0.277±0.007 | 0.313±0.005 | 0.073±0.002 | 0.039±0.007  | 0.101±0.008 | 0.070±0.007 | 0.058±0.007 | 0.132±0.009 | 0.107±0.008 |
|                   |                            | SVD         | 0.362±0.006 | 0.420±0.005 | 0.186±0.007 | 0.119±0.012  | 0.228±0.011 | 0.179±0.011 | 0.223±0.012 | 0.347±0.014 | 0.297±0.014 |
|                   |                            | GF          | 0.304±0.006 | 0.352±0.007 | 0.143±0.009 | 0.078±0.010  | 0.168±0.011 | 0.121±0.011 | 0.178±0.016 | 0.290±0.015 | 0.237±0.016 |
| Recently Proposed |                            | HOPE        | 0.340±0.006 | 0.395±0.005 | 0.163±0.006 | 0.102±0.009  | 0.208±0.011 | 0.152±0.011 | 0.205±0.013 | 0.322±0.013 | 0.266±0.013 |
|                   |                            | GraRep      | 0.370±0.007 | 0.424±0.006 | 0.177±0.005 | 0.127±0.012  | 0.238±0.010 | 0.193±0.013 | 0.216±0.014 | 0.334±0.011 | 0.283±0.011 |
|                   |                            | DeepWalk    | 0.414±0.006 | 0.472±0.005 | 0.227±0.007 | 0.129±0.012  | 0.243±0.011 | 0.194±0.011 | 0.231±0.012 | 0.357±0.011 | 0.311±0.012 |
|                   | node2vec                   | 0.420±0.006 | 0.479±0.005 | 0.231±0.010 | 0.129±0.010 | 0.243±0.009  | 0.190±0.011 | 0.241±0.014 | 0.367±0.012 | 0.313±0.013 |             |
|                   | struc2vec                  | 0.220±0.005 | 0.253±0.006 | 0.038±0.001 | 0.038±0.006 | 0.094±0.006  | 0.061±0.004 | 0.042±0.007 | 0.120±0.010 | 0.087±0.008 |             |
|                   | Deep Learning Based        | LINE        | 0.398±0.005 | 0.453±0.006 | 0.205±0.008 | 0.122±0.011  | 0.236±0.011 | 0.176±0.012 | 0.227±0.017 | 0.352±0.017 | 0.296±0.017 |
| SDNE              |                            | 0.242±0.008 | 0.271±0.016 | 0.042±0.007 | 0.037±0.006 | 0.098±0.010  | 0.047±0.007 | 0.087±0.012 | 0.178±0.013 | 0.109±0.012 |             |
| GAE               |                            | -           | -           | -           | 0.120±0.014 | 0.237±0.014  | 0.186±0.014 | 0.234±0.013 | 0.358±0.013 | 0.307±0.014 |             |

## 2 Datasets

Fig. S10: Node degree histograms of seven compiled datasets.

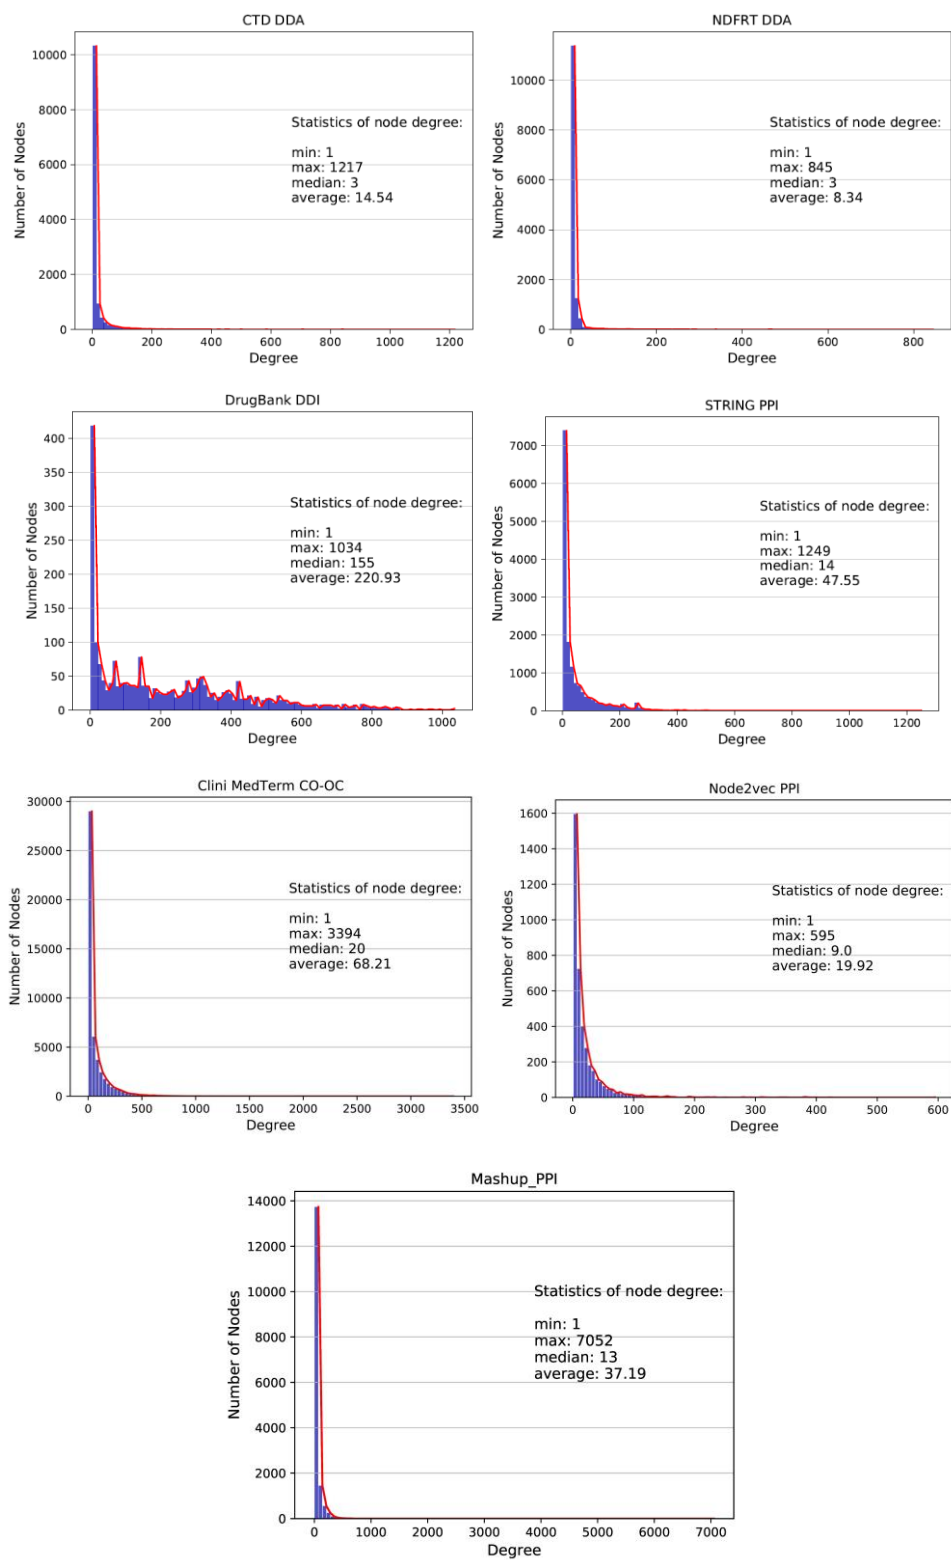

### 3 Performance of “fine-tuning”

**Table S4: Empirical results of “fine-tuning” on CTD DDA graph.**

|          |               | AUC           | ACC           | F1            |
|----------|---------------|---------------|---------------|---------------|
| DeepWalk | w/o pre-train | 0.9311        | 0.8599        | 0.8606        |
|          | w/ pretrain   | <b>0.9368</b> | <b>0.8668</b> | <b>0.8670</b> |
| LINE     | w/o pre-train | 0.9467        | 0.8768        | 0.8752        |
|          | w/ pretrain   | <b>0.9518</b> | <b>0.8856</b> | <b>0.8844</b> |



## 4 Implementation Details

### 4.1 Hardware and Software

We train all embeddings using *Ohio Supercomputer Center (OSC)* Linux servers with 24 cores Dell Intel Xeon E5-2680 v4 machine, 128GB main memory. For algorithms which need GPUs (i.e., LINE, SDNE, GAE), we use NVIDIA Tesla P100 units with 16GB memory.

To make fairly comparison, all the algorithms are executed using Python 3.6. Towards that, we use a public graph embedding learning python package: [OpenNE](#) for Laplacian Eigenmaps, HOPE, GF, DeepWalk, LINE and SDNE. According to the instructions of OpenNE, for some embedding methods (e.g., LINE, node2vec), a little difference may exist between the original implementations and theirs.

And the required python packages are listed below (see details in our released package [BioNEV](#) on GitHub):

- numpy==1.14.0
- networkx==2.0
- scipy==0.19.1
- tensorflow==1.10.0
- gensim==3.0.1
- scikit-learn==0.19.0
- tqdm==4.28.1

## 4.2 Experimental settings for comparison with state-of-the-arts in Section 4.3, 4.4 of the main manuscript.

For the comparison with LRSSL, we build a single hidden layer (128 hidden units) Multi-layer Perceptron (MLP) for each embedding method. All the hyper-parameters for the MLP is set to default in *scikit-learn*.

For the comparison with DeepDDI, we try 4 different classifiers: Navie Bayes, Linear SVM, Logistic Regression and Deep Neural Network (DNN). For the Navie Bayes, Linear SVM, Logistic Regression, all the hyper-parameters are set to default in *scikit-learn*. For DNN, we implement it using Keras in tensorflow. The DNN architecture and its hyper-parameters are the same as the ones in the original paper. The details are listed below:

|                 |                                                   |                       |
|-----------------|---------------------------------------------------|-----------------------|
| Architecture    | 8 hidden layers, 2048 hidden units for each layer |                       |
| Hyperparameters | Activation function                               | Rectified linear unit |
|                 | Batch normalization                               | Yes                   |
|                 | Batch size                                        | 256                   |
|                 | Learning rate                                     | 0.0001                |
|                 | Optimizer                                         | Adam                  |
|                 | Weight initialization                             | Uniform               |

For the comparison with Mashup, we run the original code provided by the authors to obtain embeddings for each protein. Then, we build the same classifier as other graph embedding methods to classify the protein functions.
